# Supplementary material for: Presenilin 1 Regulates [Ca2+]i and Mitochondria/ER Interaction in Cultured Rat Hippocampal Neurons
Source: Hindawi journal article supplement (doi:10.1155/2019/7284967), 2019-07-28

Supplementary Figure 1:

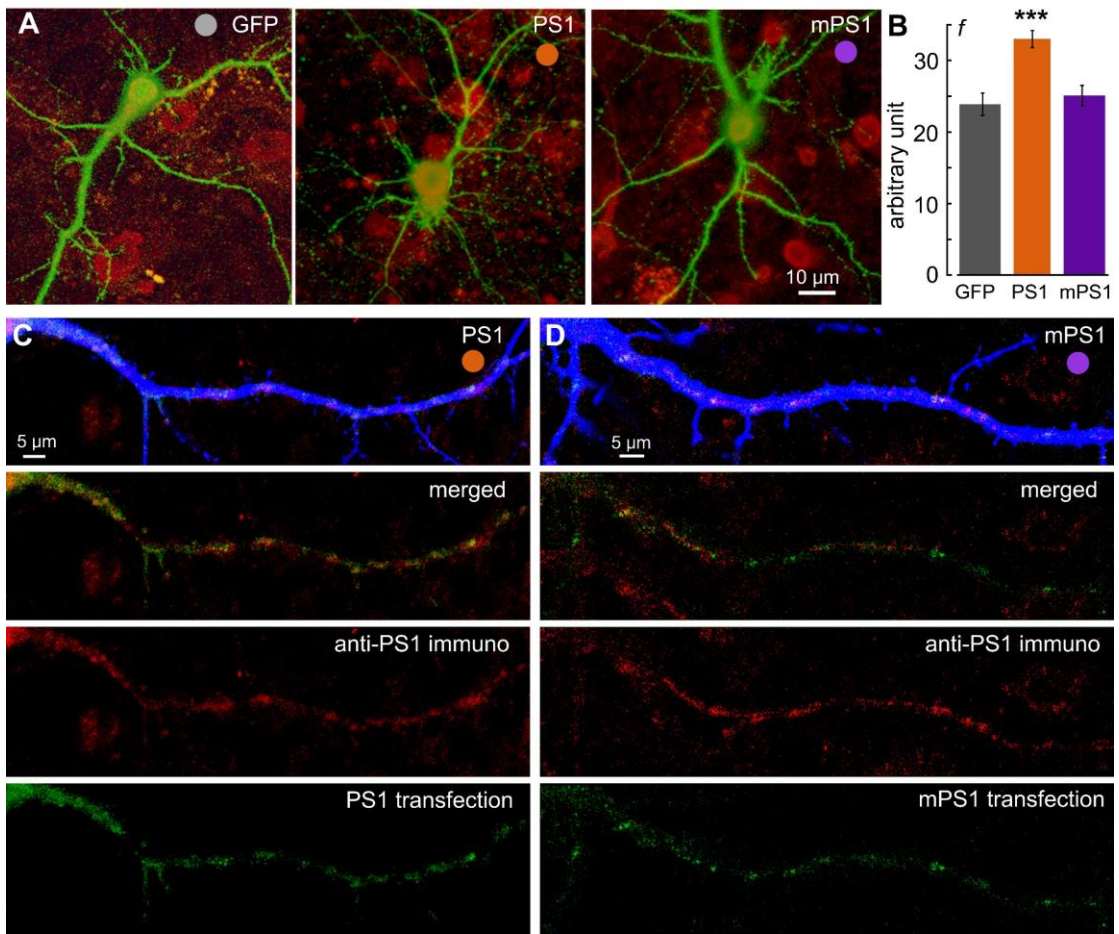

Supplement: f1 [file 7284967.f1.pdf]
